# Supplementary material for: Prevalence and Correlates of Food and/or Housing Instability among Men and Women Post-9/11 US Veterans
Source: MDPI journal article supplement (doi:10.3390/ijerph21030356), 2024-03-18
Supplement: s1 [file s1]

**Table S1.** Prevalence of FHI and bivariable associations with socioeconomic, health, and military characteristics, stratified by sex<sup>a</sup>

| Characteristic                | Men (n=9,524, 82.7% <sup>a</sup> ) |                                |                                |                                | <i>p</i> | Women (n=5,642, 17.3% <sup>a</sup> ) |                   |         |      | <i>p</i> |
|-------------------------------|------------------------------------|--------------------------------|--------------------------------|--------------------------------|----------|--------------------------------------|-------------------|---------|------|----------|
|                               | Yes, FHI <sup>b</sup>              |                                | No, FHI                        |                                |          | Yes, FHI <sup>b</sup>                |                   | No, FHI |      |          |
|                               | (n=2,893, 33.0% <sup>a</sup> )     | (n=6,631, 67.0% <sup>a</sup> ) | (n=2,017, 39.2% <sup>a</sup> ) | (n=3,625, 60.8% <sup>a</sup> ) |          |                                      |                   |         |      |          |
|                               | n                                  | %                              | n                              | %                              |          | n                                    | %                 | n       | %    |          |
| Deployment status             |                                    |                                |                                |                                | < 0.001  |                                      |                   |         |      | < 0.001  |
| Ever deployed                 | 2,066                              | 68.3                           | 5,210                          | 77.3                           |          | 1,208                                | 46.1              | 2,384   | 56.6 |          |
| Never deployed                | 827                                | 31.7                           | 1,421                          | 22.7                           |          | 809                                  | 53.9 <sup>c</sup> | 1,241   | 43.4 |          |
| Military branch               |                                    |                                |                                |                                | < 0.001  |                                      |                   |         |      | < 0.001  |
| Army                          | 1,661                              | 56.2                           | 3,196                          | 47.3                           |          | 1,111                                | 57.9              | 1,726   | 49.3 |          |
| Marine Corps                  | 391                                | 15.3                           | 803                            | 15.0                           |          | 98                                   | 6.1               | 137     | 5.4  |          |
| Navy/Coast Guard              | 465                                | 17.5                           | 1,067                          | 17.3                           |          | 414                                  | 18.4              | 708     | 19.1 |          |
| Air Force                     | 361                                | 11.0                           | 1,544                          | 20.4                           |          | 388                                  | 17.6              | 1,045   | 26.2 |          |
| Military component            |                                    |                                |                                |                                | < 0.001  |                                      |                   |         |      | 0.013    |
| Active duty                   | 1,842                              | 70.5                           | 3,972                          | 64.8                           |          | 1,239                                | 65.6              | 2,080   | 61.7 |          |
| National Guard                | 610                                | 16.4                           | 1,493                          | 19.2                           |          | 357                                  | 17.6              | 646     | 17.4 |          |
| Reserve                       | 441                                | 13.1                           | 1,166                          | 16.0                           |          | 421                                  | 16.9              | 899     | 20.8 |          |
| Rank                          |                                    |                                |                                |                                | < 0.001  |                                      |                   |         |      | < 0.001  |
| Officer/warrant officer       | 137                                | 3.4                            | 1,240                          | 16.0                           |          | 93                                   | 3.2               | 705     | 17.1 |          |
| Enlisted                      | 2,755                              | 96.6                           | 5,391                          | 84.0                           |          | 1,924                                | 96.8              | 2,920   | 82.9 |          |
| Age group (years)             |                                    |                                |                                |                                | < 0.001  |                                      |                   |         |      | < 0.001  |
| 18-24                         | 59                                 | 3.0                            | 127                            | 3.2                            |          | 47                                   | 4.6               | 62      | 3.9  |          |
| 25-34                         | 1,017                              | 43.9                           | 1,640                          | 34.0                           |          | 801                                  | 48.2              | 1,029   | 36.8 |          |
| 35-44                         | 1,011                              | 35.5                           | 1,824                          | 30.4                           |          | 762                                  | 34.2              | 1,274   | 34.3 |          |
| 45-54                         | 511                                | 12.1                           | 1,621                          | 19.4                           |          | 275                                  | 9.5               | 755     | 15.9 |          |
| 55-64                         | 253                                | 4.9                            | 1,100                          | 10.6                           |          | 121                                  | 3.2               | 419     | 7.9  |          |
| 65 or more                    | 42                                 | 0.6                            | 319                            | 2.4                            |          | 11                                   | 0.2               | 86      | 1.2  |          |
| Sexual orientation            |                                    |                                |                                |                                | < 0.001  |                                      |                   |         |      | < 0.001  |
| Heterosexual                  | 2,765                              | 95.7                           | 6,485                          | 97.9                           |          | 1709                                 | 83.9              | 3,297   | 90.6 |          |
| LGBTQ+                        | 116                                | 4.3                            | 116                            | 2.1                            |          | 301                                  | 16.1              | 309     | 9.4  |          |
| Race/ethnicity                |                                    |                                |                                |                                | < 0.001  |                                      |                   |         |      | < 0.001  |
| White, NH                     | 1,744                              | 61.1                           | 4,824                          | 72.4                           |          | 970                                  | 49.6              | 2,180   | 59.3 |          |
| Black, NH                     | 469                                | 15.1                           | 651                            | 8.9                            |          | 529                                  | 25.0              | 695     | 18.5 |          |
| Other/multiple race(s), NH    | 335                                | 11.7                           | 534                            | 8.5                            |          | 208                                  | 9.8               | 320     | 9.6  |          |
| Hispanic                      | 345                                | 12.1                           | 622                            | 10.3                           |          | 310                                  | 15.6              | 430     | 12.6 |          |
| Employment, current           |                                    |                                |                                |                                | < 0.001  |                                      |                   |         |      | 0.001    |
| Yes                           | 2,184                              | 75.9                           | 5,625                          | 87.1                           |          | 1,399                                | 70.1              | 2,661   | 74.3 |          |
| No                            | 694                                | 24.1                           | 969                            | 12.9                           |          | 610                                  | 29.9              | 945     | 25.7 |          |
| Education, current            |                                    |                                |                                |                                | < 0.001  |                                      |                   |         |      | < 0.001  |
| ≤ HS, GED                     | 488                                | 18.2                           | 695                            | 11.4                           |          | 158                                  | 10.0              | 150     | 5.3  |          |
| Some college/<br>no degree    | 1,080                              | 38.8                           | 1,606                          | 25.6                           |          | 592                                  | 32.2              | 635     | 19.9 |          |
| Associate/technical<br>degree | 531                                | 18.3                           | 1,030                          | 15.9                           |          | 465                                  | 23.6              | 622     | 17.7 |          |
| Bachelor's degree             | 516                                | 16.8                           | 1,780                          | 27.2                           |          | 511                                  | 22.5              | 1,144   | 30.3 |          |
| Graduate degree               | 278                                | 7.9                            | 1,520                          | 19.9                           |          | 291                                  | 11.7              | 1,074   | 26.7 |          |
| Marital status, current       |                                    |                                |                                |                                | < 0.001  |                                      |                   |         |      | < 0.001  |
| Never married                 | 563                                | 23.3                           | 883                            | 17.9                           |          | 463                                  | 25.5              | 566     | 18.1 |          |
| Married/domestic              | 1,700                              | 55.0                           | 4,919                          | 70.3                           |          | 915                                  | 45.0              | 2,243   | 60.5 |          |

|                                                               |       |                   |       |                   |                   |       |      |       |                   |
|---------------------------------------------------------------|-------|-------------------|-------|-------------------|-------------------|-------|------|-------|-------------------|
| partner/civil union                                           |       |                   |       |                   |                   |       |      |       |                   |
| Separated/divorced/<br>widowed                                | 620   | 21.7              | 813   | 11.8              |                   | 636   | 29.5 | 808   | 21.3              |
| Household size,<br>current                                    |       |                   |       |                   | <b>0.035</b>      |       |      |       | <b>0.002</b>      |
| 1                                                             | 392   | 13.5              | 764   | 11.8              |                   | 245   | 10.6 | 496   | 12.3              |
| 2                                                             | 722   | 24.9              | 1,980 | 27.3              |                   | 493   | 23.2 | 1,036 | 27.0              |
| 3 or more                                                     | 1,758 | 61.7              | 3,854 | 60.8              |                   | 1,272 | 66.1 | 2,080 | 60.7              |
| Household with<br>children, current                           |       |                   |       |                   | 0.889             |       |      |       | <b>&lt; 0.001</b> |
| Yes                                                           | 1,435 | 50.8 <sup>c</sup> | 3,106 | 50.7 <sup>c</sup> |                   | 1,243 | 65.4 | 1,932 | 57.4              |
| No                                                            | 1,437 | 49.2              | 3,488 | 49.3              |                   | 765   | 34.6 | 1,680 | 42.6              |
| Census region                                                 |       |                   |       |                   | <b>0.012</b>      |       |      |       | 0.509             |
| Northeast                                                     | 247   | 8.7               | 640   | 10.5              |                   | 164   | 8.4  | 316   | 8.9               |
| Midwest                                                       | 542   | 19.5              | 1,316 | 21.1              |                   | 301   | 17.0 | 606   | 17.6              |
| South                                                         | 1,417 | 48.6              | 3,122 | 45.3              |                   | 1,151 | 55.5 | 1,912 | 53.0              |
| West                                                          | 676   | 23.2              | 1,526 | 23.1              |                   | 390   | 19.1 | 768   | 20.6              |
| Urban/rural                                                   |       |                   |       |                   | 0.157             |       |      |       | <b>0.030</b>      |
| Urban                                                         | 2,388 | 82.6              | 5,567 | 84.0              |                   | 1,701 | 83.5 | 3,134 | 86.4              |
| Rural                                                         | 497   | 17.4              | 1,049 | 16.0              |                   | 306   | 16.5 | 476   | 13.6              |
| Perceived social<br>support (MSPSS)                           |       |                   |       |                   | <b>&lt; 0.001</b> |       |      |       | <b>&lt; 0.001</b> |
| High score                                                    | 1,404 | 48.1              | 4,844 | 73.3              |                   | 1,053 | 53.2 | 2,633 | 73.3              |
| Middle score                                                  | 1,119 | 40.6              | 1,405 | 21.9              |                   | 724   | 35.8 | 800   | 22.2              |
| Low score                                                     | 328   | 11.3              | 315   | 4.8               |                   | 223   | 11.0 | 170   | 4.6               |
| Ever lived with person<br>with serious illness/<br>disability |       |                   |       |                   | <b>&lt; 0.001</b> |       |      |       | <b>&lt; 0.001</b> |
| Yes                                                           | 847   | 29.0              | 811   | 11.8              |                   | 661   | 34.0 | 548   | 14.7              |
| No                                                            | 2,046 | 71.0              | 5,820 | 88.2              |                   | 1,356 | 66.0 | 3,077 | 85.3              |
| Ever homeless <sup>d</sup>                                    |       |                   |       |                   | <b>&lt; 0.001</b> |       |      |       | <b>&lt; 0.001</b> |
| Yes                                                           | 1,215 | 43.6              | 175   | 3.0               |                   | 772   | 39.6 | 93    | 2.8               |
| No                                                            | 1,678 | 56.4              | 6,456 | 97.0              |                   | 1,245 | 60.4 | 3,532 | 97.2              |
| Ever lived in<br>dangerous housing/<br>neighborhood           |       |                   |       |                   | <b>&lt; 0.001</b> |       |      |       | <b>&lt; 0.001</b> |
| Yes                                                           | 1,573 | 55.1              | 1,095 | 16.8              |                   | 1,024 | 51.8 | 492   | 13.7              |
| No                                                            | 1,320 | 44.9              | 5,536 | 83.2              |                   | 993   | 48.2 | 3,133 | 86.3              |
| Potentially traumatic<br>events, lifetime                     |       |                   |       |                   | <b>&lt; 0.001</b> |       |      |       | <b>&lt; 0.001</b> |
| 0 events                                                      | 85    | 3.4               | 722   | 12.3              |                   | 47    | 2.9  | 342   | 11.2              |
| 1-2                                                           | 296   | 10.8              | 1,522 | 24.0              |                   | 164   | 9.2  | 805   | 23.4              |
| 3-4                                                           | 431   | 15.8              | 1,508 | 22.2              |                   | 293   | 15.7 | 847   | 23.2              |
| 5-7                                                           | 811   | 28.5              | 1,697 | 24.3              |                   | 546   | 27.3 | 961   | 25.8              |
| 8 or more                                                     | 1,270 | 41.7              | 1,182 | 17.3              |                   | 967   | 45.0 | 670   | 16.3              |
| Adverse childhood<br>events                                   |       |                   |       |                   | <b>&lt; 0.001</b> |       |      |       | <b>&lt; 0.001</b> |
| No events                                                     | 515   | 17.9              | 2,494 | 37.0              |                   | 369   | 17.3 | 1,283 | 35.2              |
| 1                                                             | 428   | 13.9              | 1,337 | 20.0              |                   | 264   | 13.1 | 732   | 19.7              |
| 2-3                                                           | 675   | 23.2              | 1,560 | 23.9              |                   | 429   | 20.6 | 828   | 23.2              |
| 4 or more                                                     | 1,275 | 45.1              | 1,240 | 19.0              |                   | 955   | 49.1 | 782   | 21.9              |
| General health perception,<br>current                         |       |                   |       |                   | <b>&lt; 0.001</b> |       |      |       | <b>&lt; 0.001</b> |

|                                            |       |      |       |      |                   |       |      |       |      |                   |
|--------------------------------------------|-------|------|-------|------|-------------------|-------|------|-------|------|-------------------|
| Excellent/very good/<br>good               | 1,840 | 64.2 | 5,459 | 82.6 |                   | 1,316 | 67.0 | 2,966 | 82.3 |                   |
| Fair/poor                                  | 1,049 | 35.8 | 1,167 | 17.4 |                   | 700   | 33.0 | 653   | 17.7 |                   |
| Physical health<br>conditions, lifetime    |       |      |       |      | <b>&lt; 0.001</b> |       |      |       |      | <b>&lt; 0.001</b> |
| No conditions                              | 188   | 7.8  | 621   | 11.4 |                   | 105   | 6.3  | 364   | 12.9 |                   |
| 1                                          | 331   | 13.2 | 952   | 17.1 |                   | 208   | 11.9 | 499   | 16.0 |                   |
| 2                                          | 327   | 12.3 | 942   | 15.0 |                   | 236   | 13.2 | 544   | 15.8 |                   |
| 3 or more                                  | 2,047 | 66.7 | 4,116 | 56.5 |                   | 1,468 | 68.5 | 2,218 | 55.3 |                   |
| Body mass index<br>(kg/m <sup>2</sup> )    |       |      |       |      | <b>&lt; 0.001</b> |       |      |       |      | <b>&lt; 0.001</b> |
| < 18.5                                     | 17    | 0.7  | 22    | 0.3  |                   | 26    | 1.4  | 35    | 1.0  |                   |
| 18.5 – < 25                                | 495   | 19.2 | 1014  | 16.9 |                   | 499   | 28.0 | 1,150 | 33.1 |                   |
| 25.0 – < 30                                | 1,049 | 36.3 | 2,850 | 43.1 |                   | 620   | 29.6 | 1,290 | 35.8 |                   |
| 30.0 – < 40                                | 1,169 | 39.0 | 2,499 | 36.7 |                   | 747   | 35.7 | 1,002 | 27.3 |                   |
| ≥ 40                                       | 140   | 4.8  | 196   | 2.9  |                   | 113   | 5.3  | 107   | 2.8  |                   |
| Hypertension, lifetime <sup>e</sup>        |       |      |       |      | <b>&lt; 0.001</b> |       |      |       |      | 0.102             |
| Yes                                        | 1,087 | 33.8 | 2,158 | 27.8 |                   | 454   | 19.8 | 747   | 17.8 |                   |
| No                                         | 1,806 | 66.2 | 4,473 | 72.2 |                   | 1,563 | 80.2 | 2,878 | 82.2 |                   |
| Diabetes, lifetime <sup>e</sup>            |       |      |       |      | 0.445             |       |      |       |      | <b>&lt; 0.001</b> |
| Yes                                        | 204   | 4.8  | 483   | 5.2  |                   | 126   | 5.0  | 138   | 3.0  |                   |
| No                                         | 2,689 | 95.2 | 6,148 | 94.8 |                   | 1,891 | 95.0 | 3,487 | 97.0 |                   |
| High cholesterol,<br>lifetime <sup>e</sup> |       |      |       |      | <b>0.017</b>      |       |      |       |      | <b>0.099</b>      |
| Yes                                        | 939   | 26.8 | 2,316 | 29.4 |                   | 483   | 20.5 | 822   | 18.6 |                   |
| No                                         | 1,954 | 73.2 | 4,315 | 70.6 |                   | 1,534 | 79.5 | 2,803 | 81.4 |                   |
| Heart condition,<br>lifetime <sup>e</sup>  |       |      |       |      | <b>0.004</b>      |       |      |       |      | 0.152             |
| Yes                                        | 277   | 7.8  | 542   | 6.2  |                   | 141   | 6.5  | 212   | 5.4  |                   |
| No                                         | 2,616 | 92.2 | 6,089 | 93.8 |                   | 1,876 | 93.5 | 3,413 | 94.6 |                   |
| Had healthy diet,<br>past 3 mos.           |       |      |       |      | <b>&lt; 0.001</b> |       |      |       |      | <b>&lt; 0.001</b> |
| Most/all of the time                       | 1,323 | 44.8 | 3,930 | 58.4 |                   | 1,067 | 52.3 | 2,393 | 65.6 |                   |
| Rarely/never/<br>some times                | 1,551 | 55.2 | 2,660 | 41.6 |                   | 949   | 47.7 | 1,220 | 34.4 |                   |
| Depression, lifetime                       |       |      |       |      | <b>&lt; 0.001</b> |       |      |       |      | <b>&lt; 0.001</b> |
| Yes                                        | 1,098 | 39.1 | 1,154 | 18.3 |                   | 1,134 | 55.8 | 1,255 | 34.8 |                   |
| No                                         | 1,795 | 60.9 | 5,477 | 81.7 |                   | 883   | 44.2 | 2,370 | 65.2 |                   |
| PTSD, lifetime                             |       |      |       |      | <b>&lt; 0.001</b> |       |      |       |      | <b>&lt; 0.001</b> |
| Yes                                        | 975   | 34.7 | 1,063 | 17.7 |                   | 773   | 36.2 | 746   | 19.9 |                   |
| No                                         | 1,918 | 65.3 | 5,568 | 82.3 |                   | 1,244 | 63.8 | 2,879 | 80.1 |                   |
| Cigarette/other tobacco<br>use lifetime    |       |      |       |      | <b>&lt; 0.001</b> |       |      |       |      | <b>&lt; 0.001</b> |
| Yes                                        | 2,201 | 77.2 | 4,465 | 68.8 |                   | 1,203 | 60.6 | 1,753 | 48.0 |                   |
| No                                         | 692   | 22.8 | 2,166 | 31.2 |                   | 814   | 39.4 | 1,872 | 52.0 |                   |
| E-cigarettes, lifetime                     |       |      |       |      | <b>&lt; 0.001</b> |       |      |       |      | <b>&lt; 0.001</b> |
| Yes                                        | 927   | 35.8 | 1,125 | 20.1 |                   | 516   | 28.4 | 517   | 15.6 |                   |
| No                                         | 1,966 | 64.2 | 5,506 | 79.9 |                   | 1,501 | 71.6 | 3,108 | 84.4 |                   |
| Alcohol, lifetime                          |       |      |       |      |                   |       |      |       |      |                   |
| Yes                                        | 2,715 | 93.9 | 6,192 | 93.5 |                   | 1,859 | 91.7 | 3,267 | 89.9 |                   |
| No                                         | 178   | 6.1  | 439   | 6.5  |                   | 158   | 8.3  | 358   | 10.1 |                   |

|                                                                                 |       |                   |       |      |         |       |      |       |         |  |
|---------------------------------------------------------------------------------|-------|-------------------|-------|------|---------|-------|------|-------|---------|--|
| Of those with<br>lifetime alcohol use,<br>ever excessively used                 |       |                   |       |      | < 0.001 |       |      |       | < 0.001 |  |
| Yes                                                                             | 1,815 | 67.3              | 3,505 | 58.4 |         | 1,019 | 53.8 | 1,455 | 44.4    |  |
| No                                                                              | 900   | 32.7              | 2,687 | 41.6 |         | 840   | 46.2 | 1,812 | 55.6    |  |
| Medical marijuana,<br>lifetime                                                  |       |                   |       |      | < 0.001 |       |      |       | < 0.001 |  |
| Yes                                                                             | 319   | 12.1              | 245   | 4.3  |         | 180   | 9.9  | 123   | 3.5     |  |
| No                                                                              | 2,574 | 87.9              | 6,386 | 95.7 |         | 1,837 | 90.1 | 3,502 | 96.5    |  |
| Cannabis (not for<br>medical reasons),<br>lifetime                              |       |                   |       |      | < 0.001 |       |      |       | < 0.001 |  |
| Yes                                                                             | 1,050 | 38.1              | 1,349 | 21.5 |         | 572   | 30.0 | 548   | 16.1    |  |
| No                                                                              | 1,843 | 61.9              | 5,282 | 78.5 |         | 1,445 | 70.0 | 3,077 | 83.9    |  |
| Use of illegal/street drugs,<br>lifetime                                        |       |                   |       |      | < 0.001 |       |      |       | < 0.001 |  |
| Yes                                                                             | 988   | 35.7              | 1,285 | 20.2 |         | 501   | 25.8 | 508   | 14.9    |  |
| No                                                                              | 1,905 | 64.3              | 5,346 | 79.8 |         | 1,516 | 74.2 | 3,117 | 85.1    |  |
| Ever used prescription<br>drugs for nonmedical<br>reasons                       |       |                   |       |      | < 0.001 |       |      |       | < 0.001 |  |
| Yes                                                                             | 441   | 16.9              | 385   | 6.9  |         | 229   | 12.2 | 169   | 5.2     |  |
| No                                                                              | 2,452 | 83.1              | 6,246 | 93.1 |         | 1,788 | 87.8 | 3,456 | 94.8    |  |
| Of those who have ever<br>used prescription drugs (for<br>non-medical reasons): |       |                   |       |      |         |       |      |       |         |  |
| Ever used<br>prescription stimulants                                            |       |                   |       |      | 0.002   |       |      |       | 0.597   |  |
| Yes                                                                             | 219   | 52.8 <sup>c</sup> | 156   | 41.9 |         | 101   | 45.1 | 69    | 42.2    |  |
| No                                                                              | 222   | 47.2              | 229   | 58.1 |         | 128   | 54.9 | 100   | 57.8    |  |
| Ever used<br>prescription sedatives                                             |       |                   |       |      | 0.007   |       |      |       | 0.951   |  |
| Yes                                                                             | 267   | 60.0              | 196   | 50.4 |         | 134   | 59.3 | 101   | 59.7    |  |
| No                                                                              | 174   | 40.0              | 189   | 49.6 |         | 95    | 40.7 | 68    | 40.3    |  |
| Ever used prescription<br>opioids                                               |       |                   |       |      | 0.412   |       |      |       | 0.087   |  |
| Yes                                                                             | 303   | 69.2              | 249   | 66.2 |         | 153   | 68.8 | 101   | 60.0    |  |
| No                                                                              | 138   | 30.8              | 136   | 33.8 |         | 76    | 31.2 | 68    | 40.0    |  |

BMI (kg/m<sup>2</sup>), body mass index: < 18.5 (underweight), 18.5 - < 25 (normal weight), 25.0 - < 30 (overweight), 30.0 - < 40 (obese), ≥ 40 (morbidly obese); FHI, food and/or housing instability; GED, General Educational Diploma; HS, high school; LGBTQ+, lesbian, gay, bisexual, transgender, queer/questioning, or other gender identity; MSPSS, MSPSS, Multidimensional Scale of Perceived Social Support; NH, non-Hispanic.

<sup>a</sup> Statistics were weighted (except for counts). Boldface indicates values that are statistically significant ( $p \leq 0.05$ ).

<sup>b</sup> Crude odds ratio (OR) between FHI and sex (Women: men, OR=1.31, 95% confidence interval:1.21-1.41,  $p < 0.001$ ).

<sup>c</sup> Higher percentage found for lower unweighted count reflects the assigned weights which here response-bias adjusts for the non-deployed veterans' lower propensity to respond to the survey.

<sup>d</sup> Ever being homeless was reported for 16.4% of men and 17.2% of women ( $p = 0.945$ ).

<sup>e</sup> Age at diagnosis mean(standard error): diabetes, 41.6(0.40); hypertension, 34.2(0.16); hypercholesterolemia, 36.4(0.16); heart condition(s), 35.4(0.55).
